# Supplementary material for: The Coffee Compromise: Is Agricultural Expansion into Tree Plantations a Sustainable Option?
Source: MDPI journal article supplement (doi:10.3390/su14053019), 2022-03-04
Supplement: s1 [file s1]

## Supplementary Information

### Carbon

Biophysical input values are provided in Table S 1. Average aboveground biomass estimate for secondary natural forest was obtained from Uryu, et al. [1]. Aboveground biomass for *Pinus merkusii* monoculture was calculated as an average from values provided in Miyakuni, et al. [2], Hairiah, et al. [3] and Yulistyarini and Sofiah [4]. Aboveground carbon value for full sun coffee was obtained from van Noordwijk, et al. [5] and for annual crop (taro) from Hairiah, et al. [3].

**Table S1.** Table of mean carbon stocks for production forest band per scenario of InVEST carbon model.

| Scenario                 | Aboveground Carbon (C/Mg/ha) | Belowground Carbon (C/Mg/ha) | Dead Carbon (C/Mg/ha) | Soil carbon reduction factor |
|--------------------------|------------------------------|------------------------------|-----------------------|------------------------------|
| Natural forest           | 124                          | 29.8                         | 2.1                   | 0                            |
| Pine monoculture         | 75.8                         | 15.2                         | 1.28                  | 0.069                        |
| Pine-coffee Agroforestry | 78                           | 17.6                         | 1.32                  | 0.047                        |
| Full sun coffee          | 7                            | 1.8                          | 0.12                  | 0.101                        |
| Annual crop (taro)       | 1.8                          | 0.9                          | 0.03                  | 0.242                        |

### Nitrogen

**Table S2.** Table of biophysical input values for production forest band per scenario for InVEST nutrient retention model.

| Scenario                 | Nitrogen load (Kg/N/ha/year) | Retention coefficient (unitless) | Retention length (meters) |
|--------------------------|------------------------------|----------------------------------|---------------------------|
| Natural forest           | 23.45                        | 0.80                             | 300                       |
| Pine monoculture         | 23.45                        | 0.60                             | 300                       |
| Pine-coffee Agroforestry | 209.15                       | 0.70                             | 300                       |
| Full sun coffee          | 185.7                        | 0.40                             | 25                        |
| Annual crop              | 180.7                        | 0.40                             | 25                        |

### Sediment

**Table S3.** Table of biophysical input values for production forest band per scenario for InVEST sediment retention model

| Scenario                 | Cover management factor (unitless) | Support practice factor (unitless) |
|--------------------------|------------------------------------|------------------------------------|
| Natural forest           | 0.0001                             | 0.05                               |
| Pine monoculture         | 0.1                                | 0.75                               |
| Pine-coffee Agroforestry | 0.07                               | 0.75                               |
| Full sun coffee          | 0.2                                | 0.75                               |
| Annual crop (taro)       | 0.34                               | 0.75                               |

## Water yield

Crop evapotranspiration coefficients (Kc) were obtained from Allen, et al. [6]. Rooting depths of deciduous and evergreen forests used in InVEST were obtained from [7] and applied to all ‘forest’ land cover types. Depth at which 95% of root biomass occurs was obtained for coffee from Defrenet, et al. [8] and for annual crop from Tumuhimbise [9].

**Table S4.** Table of biophysical input values for production forest band per scenario for InVEST water yield model.

| Scheme 3000.             | Root depth (mm) | Kc (unitless) |
|--------------------------|-----------------|---------------|
| Natural forest           | 3000            | 1             |
| Pine monoculture         | 3000            | 1             |
| Pine-coffee Agroforestry | 3000            | 1.09          |
| Full sun coffee          | 1500            | 0.95          |
| Annual crop (taro)       | 300             | 0.67          |

1. Uryu, Y.; Mott, C.; Foead, N.; Yulianto, K.; Budiman, A.; Setiabudi; Takakai, F.; Nursamsu.; Sunarto.; Purastuti, E.; Fadhli, N.; Hutajulu, C. M. B.; Jaenicke, J.; Hatano, R.; Siegert, F.; Stüwe, M. *Deforestation, Forest Degradation, Biodiversity Loss and CO2 Emissions in Riau, Sumatra, Indonesia*; Jakarta, Indonesia., 2008.
2. Miyakuni, K.; Heriyanto, N. M.; Heriansyah, I.; Imanuddin, R.; Kiyono, Y., Allometric equations and parameters for estimating the biomass of planted *Pinus merkusii* Jungh. et de Vr. forests. *Japanese Journal for the Environment* **2005**, 47, (2), 95-104.
3. Hairiah, K.; Kurniawan, S.; Aini, F. K.; Lestari, N. D.; Lestariningsih, I. D.; Widiyanto; Zulkarnaen, T.; van Noordwijk, M., Carbon Stock Assessment for a Forest-to-Coffee Conversion Landscape in Kalikonto Watershed (East Java, Indonesia): Scaling up from plot to landscape level. In *INTERNATIONAL CONFERENCE ON COFFEE SCIENCE (ASIC)*, Denpasar, Bali, 2010.
4. Yulistyarini, T.; Sofiah, S., Valuing quality of vegetation in recharge area of Seruk Spring, Pesanggrahan Valley, Batu City, East Java. *Biodiversitas, Journal of Biological Diversity* **2011**, 12, (4), 229-234.
5. van Noordwijk, M.; Rahayu, S.; Hairiah, K.; Wulan, Y. C.; Farida, A.; Verbist, B., Carbon stock assessment for a forest-to-coffee conversion landscape in Sumber-Jaya (Lampung, Indonesia): from allometric equations to land use change analysis. *Science in China* **2002**, 45, (Series C).
6. Allen, R. G.; Pereira, L. S.; Raes, D.; Smith, M. *Crop evapotranspiration - Guidelines for computing crop water requirements*; FAO - Food and Agriculture Organization of the United Nations: Rome, 1998.
7. Sharps, K.; Masante, D.; Thomas, A.; Jackson, B.; Redhead, J.; May, L.; Prosser, H.; Cosby, B.; Emmett, B.; Jones, L., Comparing strengths and weaknesses of three ecosystem services modelling tools in a diverse UK river catchment. *Science of The Total Environment* **2017**, 584-585, 118-130.
8. Defrenet, E.; Rounsard, O.; Van den Meersche, K.; Charbonnier, F.; Pastor Perez-Molina, J.; Khac, E.; Prieto, I.; Stokes, A.; Roumet, C.; Rapidel, B.; de Melo Virginio Filho, E.; Vargas, V. J.; Robelo, D.; Barquero, A.; Jourdan, C., Root biomass, turnover and net primary productivity of a coffee agroforestry system in Costa Rica: effects of soil depth, shade trees, distance to row and coffee age. *Ann Bot* **2016**, 118, (4), 833-851.
9. Tumuhimbise, R., Plant Spacing and Planting Depth Effects on Corm Yield of Taro (*Colocasia esculenta* (L.) Schott). *Journal of Crop Improvement* **2015**, 29, (6), 747-757.
